# Supplementary material for: Shared Risk Genes and Common Molecular Pathways Between PCOS and RPL by Integrated Transcriptomic Analysis and Machine Learning
Source: Research Square preprint supplement (doi:10.21203/rs.3.rs-6337423/v1), 2025-05-07
Supplement: Supplementary file 1 [file 29a95f2a921b5325d34b5ea2.docx]

| **Primer Name** | **Primer Sequence (5'to3')** | **Product Size（bp）** |
| --- | --- | --- |
| IL1RN-F3 | TCCATAATCTGGACTCCTCTGTCC | 126 |
| IL1RN-R3 | AGCCTTGGGAGCTGAGAAACT |
| GAPDH-F | GGAGTCCACTGGCGTCTTCA | 240 |
| GAPDH-R | GTCATGAGTCCTTCCACGATACC |
